# Supplementary material
Source: publisher site journal article supplement (https://www.dovepress.com/article/136878)

### Supplementary 1

[http://www.cbioportal.org/index.do?cancer\\_study\\_list=paad\\_tcga&cancer\\_study\\_id=paad\\_tcga&genetic\\_profile\\_ids\\_PROFILE\\_MUTATION\\_EXTENDED=paad\\_tcga\\_mutations&genetic\\_profile\\_ids\\_PROFILE\\_COPY\\_NUMBER\\_ALTERATION=paad\\_tcga\\_gistic&genetic\\_profile\\_ids\\_PROFILE\\_MRNA\\_EXPRESSION=paad\\_tcga\\_rna\\_seq\\_v2\\_mrna\\_median\\_Zscores&Z\\_SCORE\\_THRESHOLD=2.0&genetic\\_profile\\_ids\\_PROFILE\\_PROTEIN\\_EXPRESSION=paad\\_tcga\\_rppa\\_Zscores&RPPA\\_SCORE\\_THRESHOLD=2.0&data\\_priority=0&case\\_set\\_id=paad\\_tcga\\_rna\\_seq\\_v2\\_mrna&case\\_ids=&patient\\_case\\_select=sample&gene\\_set\\_choice=user-defined-list&gene\\_list=MALAT1&clinical\\_param\\_selection=null&tab\\_index=tab\\_visualize&Action=Submit&show\\_samples=false&](http://www.cbioportal.org/index.do?cancer_study_list=paad_tcga&cancer_study_id=paad_tcga&genetic_profile_ids_PROFILE_MUTATION_EXTENDED=paad_tcga_mutations&genetic_profile_ids_PROFILE_COPY_NUMBER_ALTERATION=paad_tcga_gistic&genetic_profile_ids_PROFILE_MRNA_EXPRESSION=paad_tcga_rna_seq_v2_mrna_median_Zscores&Z_SCORE_THRESHOLD=2.0&genetic_profile_ids_PROFILE_PROTEIN_EXPRESSION=paad_tcga_rppa_Zscores&RPPA_SCORE_THRESHOLD=2.0&data_priority=0&case_set_id=paad_tcga_rna_seq_v2_mrna&case_ids=&patient_case_select=sample&gene_set_choice=user-defined-list&gene_list=MALAT1&clinical_param_selection=null&tab_index=tab_visualize&Action=Submit&show_samples=false&)

### Supplementary 2

|                   |
|-------------------|
| overlapping genes |
| STAT2             |
| NBN               |
| TOP2A             |
| SMC1A             |
| FOS               |
| FOSB              |
| CUX1              |
| GATA1             |
| DDIT3             |
| HIRA              |
| MED26             |
| ELP4              |
| JUNB              |
| KLF9              |
| NOTCH4            |
| EHF               |
| TRAPPC2           |
| MLLT6             |
| TSSK4             |
| PPARA             |
| NFRKB             |
| NFIL3             |
| TCERG1            |
| TRIM24            |
| NFE2L3            |
| PAIP1             |
| SARS2             |
| AGGF1             |
| LUC7L3            |
| SRSF5             |

|         |
|---------|
| GSPT1   |
| GRSF1   |
| ZNF638  |
| DDX17   |
| POLA1   |
| PMS2    |
| RAD23B  |
| DUT     |
| POLE3   |
| TSN     |
| MAPK8   |
| MAP3K6  |
| NR4A3   |
| DERL1   |
| AGER    |
| PRMT2   |
| MAST2   |
| CCND1   |
| PIM1    |
| DSP     |
| TRIB2   |
| AURKC   |
| MAP3K8  |
| UBE3C   |
| SIRT3   |
| GGCX    |
| SERP1   |
| FNTB    |
| SEPHS1  |
| UBE2K   |
| UBE2H   |
| SNX6    |
| ADM     |
| PER1    |
| CDKN2B  |
| TNFSF15 |
| PXN     |
| RHOB    |
| CARD8   |
| RICTOR  |
| TRADD   |
| ECT2    |
| CRIPAK  |

|          |
|----------|
| CXCR4    |
| GADD45B  |
| PIK3CB   |
| S1PR4    |
| IFNAR1   |
| RRAGC    |
| STYXL1   |
| VEGFA    |
| GNRH1    |
| SERPINB9 |
| TLE2     |
| FGF17    |
| TNFSF9   |
| RGS16    |
| RHO      |
| GEM      |
| TRPV1    |
| RASD1    |
| CLEC1A   |
| IL13RA1  |
| PIP5K1A  |
| VEGFC    |
| RPS6KC1  |
| NR4A1    |
| GNG12    |
| RSU1     |
| STAT6    |
| PEX11A   |
| IQGAP1   |
| CACNA1I  |
| EIF4A2   |
| EIF5     |
| EIF3A    |
| HSP90AA1 |
| MYH9     |
| EIF2B1   |
| ATG4C    |
| ATG4B    |
| LMAN1    |
| SPCS1    |
| SPEG     |
| CGREF1   |
| MAGED1   |

|          |
|----------|
| ING1     |
| PPP1R15A |
| BFAR     |
| SERTAD3  |
| RACGAP1  |
| KRTAP5-9 |
| KRT15    |
| LAMC2    |
| EGR2     |
| DGCR2    |
| EGR3     |
| DRP2     |
| HMGB3    |
| AFF3     |
| ZMYM6    |
| TTK      |
| CHRNA10  |
| CDC16    |
| RAPGEF3  |
| CLK1     |
| MKI67    |
| ZFP36L2  |
| TIA1     |
| CDH1     |
| TMED10   |
| KIF1B    |
| LRPPRC   |
| KIF5B    |
| SNAP29   |
| CYTH2    |
| NEBL     |
| TIMM17A  |
| SUV39H2  |
| SATB1    |
| ATXN7    |
| FMR1     |
| NUFIP2   |
| ADI1     |
| SMC2     |
| NXF3     |
| BACH1    |
| SLC33A1  |
| TM9SF2   |

|          |
|----------|
| NUCB2    |
| TMEM50B  |
| ATP5G3   |
| PPOX     |
| USO1     |
| ERLIN2   |
| GOSR1    |
| SEC62    |
| SDHD     |
| NEK2     |
| GGA2     |
| GOLGA4   |
| EIF4E    |
| PGS1     |
| RDH14    |
| PGAP1    |
| YIPF4    |
| YWHAB    |
| SLC25A27 |
| KIAA0141 |
| TMED5    |
| TMED9    |
| EHHADH   |
| TRAK2    |
| DCAF7    |
| TXNIP    |
| PAFAH1B2 |
| PLCG1    |
| DDIT4    |
| PPP2R5E  |
| CBS      |
| RBM39    |
| RPP14    |
| CCNY     |
| SH3BP4   |
| WDR33    |
| MCM10    |
| METTL3   |
| USP37    |
| PNN      |
| KCNH4    |
| KCNMA1   |
| CACNB1   |

|          |
|----------|
| APP      |
| MET      |
| SLC31A1  |
| AQP7     |
| CAPRIN1  |
| TRPM1    |
| NGFR     |
| VAMP1    |
| EPB42    |
| CLIP2    |
| HIST4H4  |
| EFHC1    |
| EBNA1BP2 |
| KREMEN1  |
| PCYT1A   |
| ATF3     |
| RLF      |
| SOX4     |
| DGKE     |
| CLK2     |
| PLS1     |
| RAB2A    |

### Supplementary 3

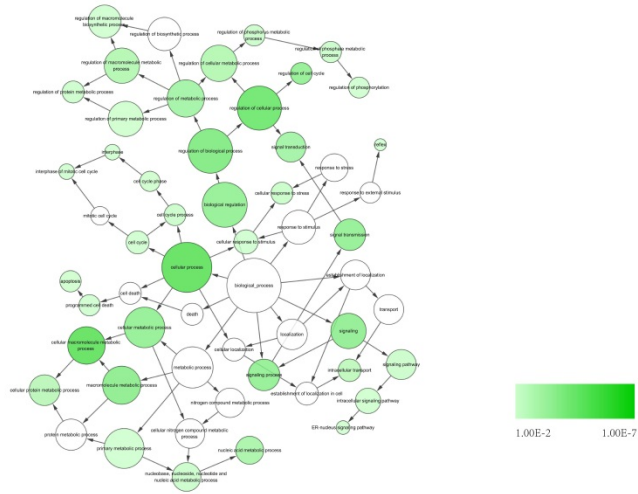

### Supplementary 4

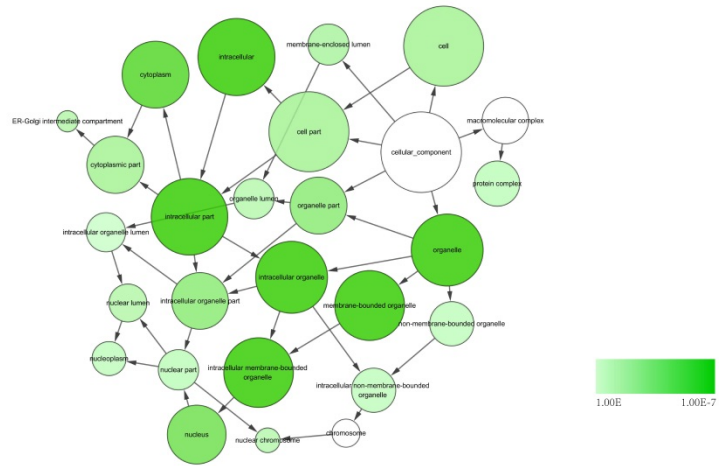

### Supplementary 5

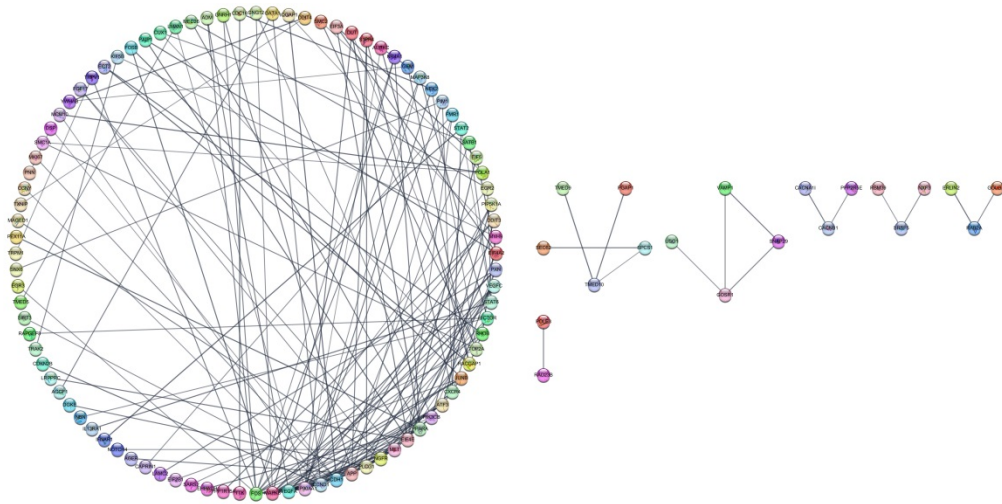

Supplement: Supplementary file 1 [file get_supplementary_file.php]
